# Supplementary material
Source: PubMed Central journal article supplement (PMC149876)
Supplement: pnas_0337742100_1.pdf [file pnas_0337742100_1.pdf]

**Table 1. Bacterial strains and plasmids used in this study**

| Strain or plasmid             | Genotype or relevant characteristic                                                                                                                | Ref. or source |
|-------------------------------|----------------------------------------------------------------------------------------------------------------------------------------------------|----------------|
| <i>Escherichia coli</i>       |                                                                                                                                                    |                |
| XL1-Blue                      | <i>RecA1, endA1, gyrA96, thi-1, hsdR17, supE44, relA1, lac, [F', proAB, lacI<sup>f</sup>ZAM15, Tn10 (tet<sup>R</sup>)]</i>                         | 1, Stratagene  |
| B ER2566                      | <i>F', λ, fhuA2 [lon], ompT, lacZ::T7, geneI, gal, sulA11, Δ(mcrC-mrr)114::IS10, R (mcr-73::miniTn10)2, R(zgb-210::Tn10)1, (TetS), endA1 [dcm]</i> | 2, NEB         |
| M15(pREP4)                    | <i>Lac, ara, gal, mtl, recA<sup>+</sup>, uvr<sup>+</sup>, [pREP4, lacI, kan<sup>r</sup>]</i>                                                       | 3              |
| SK6600                        | <i>F', ara<sup>-</sup>, Δ(lac-proAB), rpsL, F80, lacZAM15(r<sup>+</sup>, m<sup>+</sup>)</i>                                                        | 4              |
| SK6600ispG::neo <sup>R</sup>  | <i>F', ara<sup>-</sup>, Δ(lac-proAB), rpsL, F80, lacZAM15(r<sup>+</sup>, m<sup>+</sup>), ispG::neo<sup>R</sup> (neo<sup>R</sup>)</i>               | This study     |
| Plasmids                      |                                                                                                                                                    |                |
| pMAL-C2                       | High-copy maltose binding protein expression vector                                                                                                | NEB            |
| pMALispG                      | Expression of <i>ispG</i> ( <i>gcpE</i> ) from <i>Escherichia coli</i> as maltose binding fusion protein                                           | This study     |
| pBluescript SKII <sup>-</sup> | High-copy cloning vector                                                                                                                           | Stratagene     |
| pACYC184                      | Low-copy cloning vector                                                                                                                            | 5, NEB         |
| pMAK705                       | Low-copy vector with temperature sensitive origin for DNA replication ( <i>Cm<sup>R</sup></i> )                                                    | 4              |
| pMAKispGneo <sup>R</sup>      | pMAK705 with a 1.7-kb fragment containing the <i>ispG</i> gene and adjacent regions interrupted by a neomycin resistance cassette                  | This study     |
| pBSipp                        | Expression of <i>mk, pmk, and dpmd</i>                                                                                                             | This study     |
| pACYCipp                      | Expression of <i>mk, pmk, and dpmd</i>                                                                                                             | This study     |
| pNCO113                       | High-copy expression vector                                                                                                                        | ATCC, PTA-852  |
| pNCOidi                       | Expression of <i>idi</i> from <i>E. coli</i>                                                                                                       | This study     |

1. Bullock, W. O., Fernandez, J. M. & Short, J. M. (1978) *BioTechniques* **5**, 376–379.

2. Studier, F. W., Rosenberg, A. H., Dunn, J. J. & Dubendorf, J. W. (1990) *Methods Enzymol.* **185**, 60–89.
3. Zamenhof, P. J. & Villarejo, M. (1972) *J. Bacteriol.* **110**, 171–178.
4. Hamilton, C. M., Aldea, M., Washburn, B. K., Babitzke, P. & Kushner, S. R. (1989) *J. Bacteriol.* **171**, 4617–4622.
5. Chang, A. C. Y. & Cohen, S. N. (1978) *J. Bacteriol.* **134**, 1141–1156.
