# Supplementary material
Source: PubMed Central journal article supplement (PMC149876)
Supplement: pnas_0337742100_3.pdf [file pnas_0337742100_3.pdf]

**Table 2. Oligonucleotides used in this study**

| <b>Designation</b> | <b>5'-Sequence-3'</b>                           |
|--------------------|-------------------------------------------------|
| gcpEEcoRI          | GAACCGGAATTCATGCATAACCAGGCTCC                   |
| gcpEhi             | CGAGGCGGATCCCATCACG                             |
| PMKvo2             | TAATAAGGATCCGAGGAGAAATTAACCATGTCAGAGTTGAGAGCC   |
| PMKhi2             | CAAGTACTGCAGGAAGATGAATGG                        |
| MKSPstI            | GACTGCCTGCAGGAGGAGAAATTAACCATGTCATTACCGTTCTTAAC |
| MKShi              | GTACGGGTCGACTTATGAAGTCCATGGTAAATTCG             |
| MDVSalI            | GGAATCGTCGACGAGGAGAAATTAACCATGGCGGAGGAGAAATGG   |
| MDVXhoI            | AGTAACCTCGAGACATAGAAATGG                        |
| gcpEBamHIc         | CGCTGGGGATCCACTTTACTGCCG                        |
| gcpEKpnI           | GTAACCGTAGGTACCGAGCACG                          |
| gcpEvocheck2       | AGCAACAACGCCAGATGG                              |
| gcpEhichk2         | CGTCGGTGACTTCACC                                |
| kansense2          | CGCTTCCTCGTGCTTTACG                             |
| kanrev2            | TTCAGTGACAACGTCGAGC                             |
| kana3              | AAGTTGTTAATTCTCATGTTTGACAGC                     |
| kana4              | CAGCTGAACCAACTCGCGAGG                           |
| IPPvo              | GAGGAGAAATTAACCATGCAAACGGAACACGCT               |
| IPPhi              | GCATTACGGGATCCTCACAACC                          |
| K-EcoRI            | ACACAGAATTCATTAAAGAGGAGAAATTAACCATG             |
| fldAvo             | GTCAGTGGATCCATGGCTATCACTGGCATCTTTTTTCG          |
| fldAhi             | GGAGCTCTGCAGTCAGGCATTGAGAATTTTCG                |
| fprvo              | GGTCTGGGATCCATGGCTGATTGGGTAACAGGC               |
| fprhi              | GTTCAGCTGCAGTTACCAGTAATGCTCCGC                  |
| K-EcoRI            | ACACAGAATTCATTAAAGAGGAGAAATTAACCATG             |
